# Supplementary material for: KAT2B Gene Polymorphisms Are Associated with Body Measure Traits in Four Chinese Cattle Breeds
Source: MDPI journal article supplement (doi:10.3390/ani12151954), 2022-08-01
Supplement: s1 [file s1]

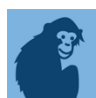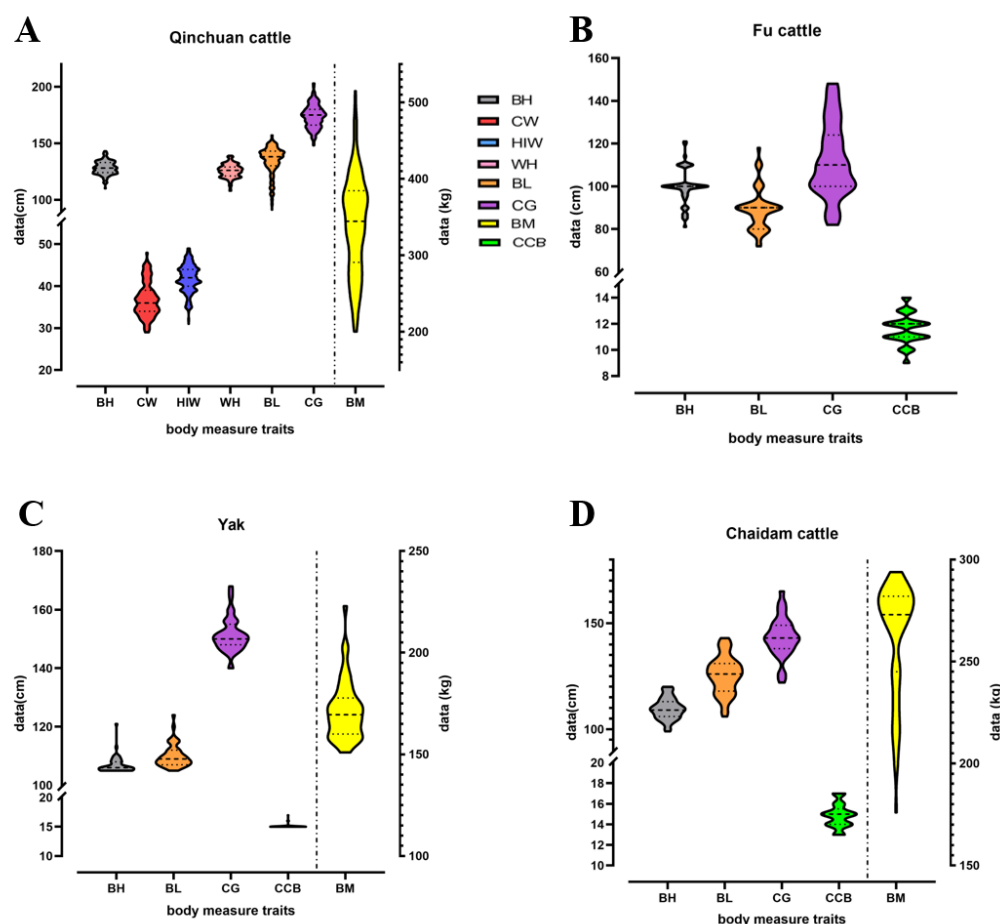

**Figure S1.** Distribution of phenotypes in Qinchuan cattle (A), Fu cattle (B), Yak (C), Chaidam cattle (D). BH=body height, CW=chest width, HIW=hip-width, WH=withers height, BL=body length, CG=chest girth, CCB=circumference of cannon bone, BM=body mass.

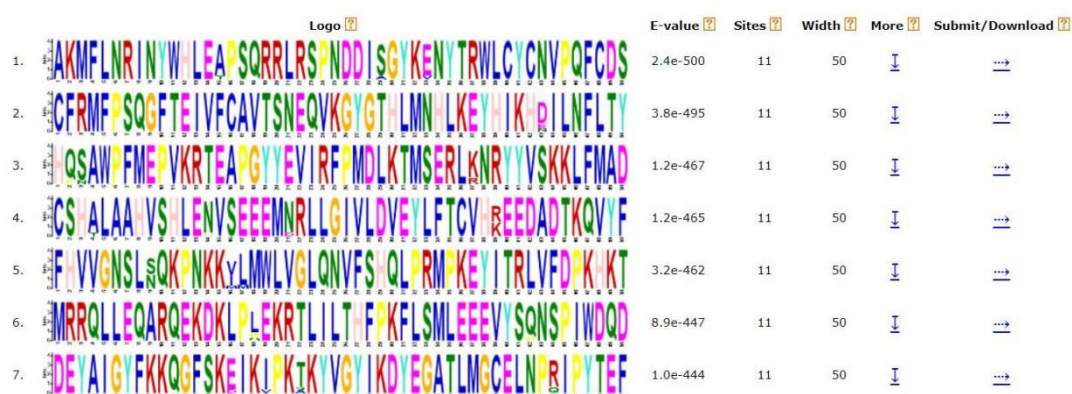

**Figure S2.** Significant motifs of KAT2B across the 11 species. Motifs were detected using the MEME suite. The different color letters show abbreviations of different amino acids, given through motif analysis on the MEME suite system.

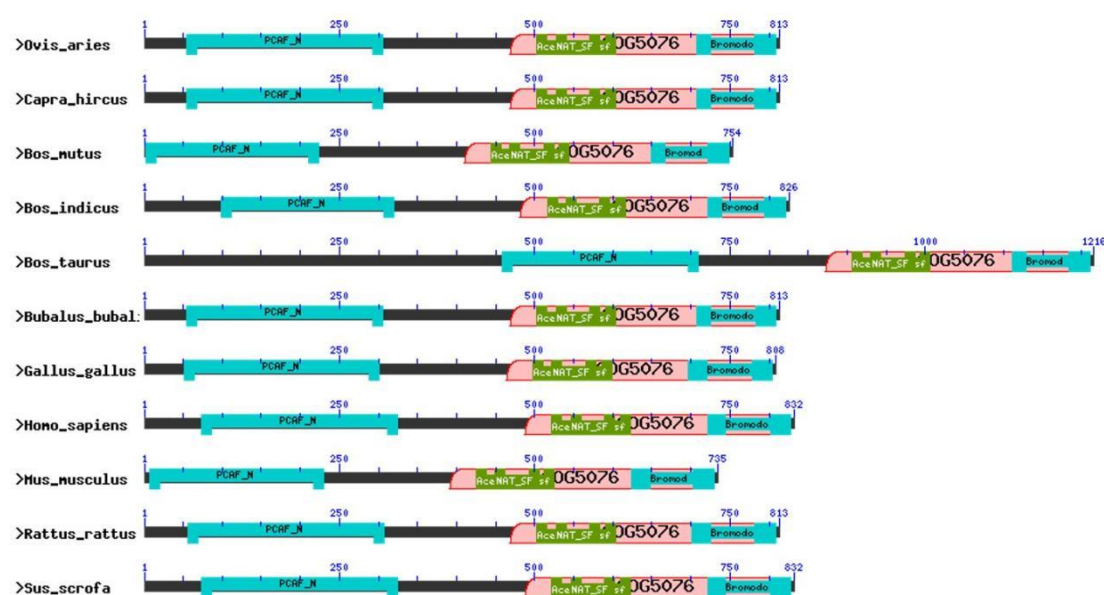

**Figure S3.** Structure of KAT2B protein domain families in the 11 species. Each color bar is a specific hit representing a different domain superfamily.

**Table S1.** Primers for exploring genetic variations of bovine *KAT2B* gene.

| Targeted Exon | Sequence (5'-3')             | Tm (°C) | Production Size (bp) |
|---------------|------------------------------|---------|----------------------|
| Exon1         | F: TCCTGGGATGCTCTTGCGCC      | 63      | 597                  |
|               | R: AAGCCATGTTCTCTGAGGTGATGTT |         |                      |
| Exon2         | F: TCAGCGGAAAAGAAACCAAA      | 57      | 827                  |
|               | R: GGAAAAGTGAGCGGAGACAA      |         |                      |
| Exon3         | F: TGGCTGTAAGGAAGGGGTGA      | 55      | 874                  |
|               | R: GTGGGTCTTGATGCTCTGTG      |         |                      |
| Exon4         | F: GTGTCCCACCTGTCCTCC        | 53      | 772                  |
|               | R: TGTCTTCACATTGCTCCTG       |         |                      |
| Exon5         | F: GCAAAGCTGCATGAGTAAAC      | 52      | 770                  |
|               | R: TGGAGATGAGTCTGAGCAAG      |         |                      |
| Exon6         | F: CTTATCACTTCCTGCGTTTT      | 53      | 757                  |
|               | R: ACCCAAAGTCAACCTCATCT      |         |                      |
| Exon7         | F: CCTACATGGAGCCCAAAGAG      | 57      | 881                  |
|               | R: GCACTGCACGTCCTGAGACT      |         |                      |
| Exon8         | F: TTGCTTCCTTATTTCTTGCC      | 55      | 796                  |
|               | R: AACTGCGTTTCTTCTGCTC       |         |                      |
| Exon9         | F: AGTCCCTGCTCAAGGAAATC      | 55      | 508                  |
|               | R: AGCATCAGACAACACGCAAA      |         |                      |
| Exon10        | F: ACTGCTGTGGACTGTCCCTT      | 55      | 706                  |
|               | R: ACCCGAGTGGTTCCTCTTTC      |         |                      |
| Exon11        | F: CCCAAACAGGAGGTGAGACA      | 54      | 635                  |
|               | R: CCAAAAGACCACATTCCAAA      |         |                      |
| Exon12        | F: GGAAGGATTGCTGATTTGTT      | 59      | 828                  |
|               | R: CCCCCTTTTGAATGTTAGG       |         |                      |
| Exon13        | F: CAGGATAGTTGGAAGGAGC       | 55      | 578                  |
|               | R: GTGGGTGAAGGATGAAGACA      |         |                      |
| Exon14        | F: CCGAGATAACTGGCACTACG      | 48      | 712                  |
|               | R: AGCAGAGCAGACGCAAAGGA      |         |                      |

---

F: TGC GTTACAAGCAGGGTCTG  
R: TTGCGTGAAGTGGAGGAAAA  
F: GGCTGGAGGATATTGATGGA  
R: ACACGCCCTAACCTATGACA  
F: GTTTCCCACTTTAGTTCTGT  
R: CATTATGTCCAATTCTTTGT

---
